# Supplementary material for: Probing the Potential Mechanism of Quercetin and Kaempferol against Heat Stress-Induced Sertoli Cell Injury: Through Integrating Network Pharmacology and Experimental Validation
Source: MDPI journal article supplement (doi:10.3390/ijms231911163), 2022-09-22
Supplement: s1 [file s1]

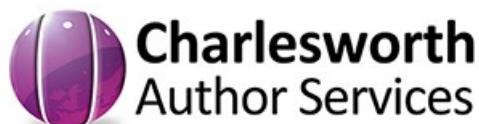

# EDITORIAL CERTIFICATE

This document certifies that the manuscript below was edited for correct English language usage, grammar, punctuation and spelling by qualified native English speaking editors at Charlesworth Author Services.

## **Paper Title:**

Probing the potential mechanism of flavonoids quercetin and kaempferol against Heat stress-induced Sertoli cell injury: Through Integrating Network Pharmacology and Experimental Validation

## **Author:**

殿龙 刘

## **Date certificate issued:**

August 19, 2022

[cwauthors.com](http://cwauthors.com)
