# Supplementary material for: Probing the Potential Mechanism of Quercetin and Kaempferol against Heat Stress-Induced Sertoli Cell Injury: Through Integrating Network Pharmacology and Experimental Validation
Source: MDPI journal article supplement (doi:10.3390/ijms231911163), 2022-09-22
Supplement: s1 [file s1]

# Supplementary materials

Table S1. Quercetin target list

| Gene                                                    | Abbreviation | Database                 |
|---------------------------------------------------------|--------------|--------------------------|
| ATP-binding cassette sub-family G member 2              | ABCA2        | TCMSP、Bindding DB        |
| P-glycoprotein 1                                        | ABCB1        | Bindding DB              |
| Canalicular multispecific organic anion transporter 1   | ABCC2        | CHEMBL                   |
| ATP-binding cassette sub-family G member 2              | ABCG2        | CHEMBL                   |
| Acetyl-CoA carboxylase 1                                | ACACA        | TCMSP                    |
| Acetylcholinesterase                                    | ACHE         | TCMSP、CHEMBL             |
| Ecto-5'-nucleotidase (e5'NT)                            | ACPP         | TCMSP、Bindding DB        |
| Adenosine receptor A1                                   | ADORA1       | Bindding DB              |
| Adenosine Receptors A2a (A2a)                           | ADORA2A      | Bindding DB              |
| Adenosine receptor A3                                   | ADORA3       | Bindding DB              |
| Beta-2 adrenergic receptor                              | ADRB2        | TCMSP                    |
| Aryl hydrocarbon receptor                               | AHR          | TCMSP、Bindding DB        |
| Activator of 90 kDa heat shock protein ATPase homolog 1 | AHSA1        | TCMSP                    |
| Aldose reductase                                        | AKR1B1       | TCMSP、Bindding DB、CHEMBL |
| RAC-alpha serine/threonine-protein kinase               | AKT1         | TCMSP                    |
| Retinal dehydrogenase 1                                 | ALDH1A1      | CHEMBL                   |
| ALK tyrosine kinase receptor                            | ALK          | CHEMBL                   |
| Arachidonate 12-lipoxygenase, 12S-type                  | ALOX12       | CHEMBL、Bindding DB       |
| Arachidonate 15-lipoxygenase                            | ALOX15       | Bindding DB              |
| Arachidonate 5-lipoxygenase                             | ALOX5        | TCMSP、Bindding DB、CHEMBL |
| Alpha-amylase 1                                         | AMY1A        | CHEMBL                   |
| Androgen receptor                                       | AR           | TCMSP                    |
| ATPase family AAA domain-containing protein 5           | ATAD5        | CHEMBL                   |
| ATP synthase subunit alpha, mitochondrial               | ATP5F1A      | STITCH                   |
| ATP synthase subunit beta, mitochondrial                | ATP5F1B      | STITCH                   |
| ATP synthase subunit gamma, mitochondrial               | ATP5F1C      | STITCH                   |
| Aurora kinase B/Inner centromere protein                | AURKB        | Bindding DB              |
| Vasopressin V2 receptor                                 | AVPR2        | CHEMBL                   |
| Apoptosis regulator BAX                                 | BAX          | TCMSP、STITCH             |
| Cholinesterase                                          | BCHE         | CHEMBL                   |
| Apoptosis regulator Bcl-2                               | BCL2         | TCMSP                    |
| Bcl-2-like protein 1                                    | BCL2L1       | TCMSP                    |

Table S1 Quercetin target list (Continued)

| Gene                                        | Abbreviation | Database |
|---------------------------------------------|--------------|----------|
| Baculoviral IAP repeat-containing protein 5 | BIRC5        | TCMSP    |

|                                                                   |        |                          |
|-------------------------------------------------------------------|--------|--------------------------|
| Bloom syndrome protein                                            | BLM    | CHEMBL                   |
| Carbonic anhydrase 1                                              | CA1    | CHEMBL                   |
| Carbonic anhydrase 12                                             | CA12   | Bindding DB              |
| Carbonic anhydrase 14                                             | CA14   | CHEMBL                   |
| Carbonic anhydrase 2                                              | CA2    | Bindding DB、CHEMBL       |
| Carbonic anhydrase 3                                              | CA3    | CHEMBL                   |
| Carbonic anhydrase 4                                              | CA4    | Bindding DB              |
| Carbonic anhydrase 5A, mitochondrial                              | CA5A   | CHEMBL                   |
| Carbonic anhydrase 6                                              | CA6    | CHEMBL                   |
| Carbonic anhydrase 7                                              | CA7    | Bindding DB、CHEMBL       |
| Calcium/calmodulin-dependent protein kinase type II subunit beta  | CAMK2B | CHEMBL                   |
| Calcium/calmodulin-dependent protein kinase type II subunit delta | CAMK2D | CHEMBL                   |
| Calcium/calmodulin-dependent protein kinase type IV               | CAMK4  | CHEMBL                   |
| Caspase-3                                                         | CASP5  | TCMSP                    |
| Caspase-8                                                         | CASP8  | TCMSP                    |
| Caspase-9                                                         | CASP9  | TCMSP                    |
| Caveolin-1                                                        | CAV1   | TCMSP                    |
| Carbonyl reductase [NADPH] 3                                      | CBR3   | CHEMBL                   |
| C-C motif chemokine 2                                             | CCL2   | TCMSP                    |
| G2/mitotic-specific cyclin-B1                                     | CCNB1  | TCMSP                    |
| G1/S-specific cyclin-D1                                           | CCND1  | TCMSP                    |
| CD40 ligand                                                       | CD40LG | TCMSP                    |
| Cell division control protein 2 homolog                           | CDK1   | TCMSP、Bindding DB、CHEMBL |
| Cyclin-Dependent Kinase 5 (CDK5)                                  | CDK5   | Bindding DB              |
| Cyclin-Dependent Kinase 6 (CDK6)                                  | CDK6   | Bindding DB              |
| Cyclin-dependent kinase inhibitor 1                               | CDKN1A | TCMSP                    |
| Cyclin-dependent kinase inhibitor 2A, isoforms 1/2/3              | CDKN2A | TCMSP                    |
| Serine/threonine-protein kinase Chk2                              | CHEK2  | TCMSP、CHEMBL             |

Table S1 Quercetin target list (Continued)

| Gene                                                     | Abbreviation | Database |
|----------------------------------------------------------|--------------|----------|
| Inhibitor of nuclear factor kappa-B kinase subunit alpha | CHUK         | TCMSP    |
| Claudin-4                                                | CLDN4        | TCMSP    |
| Dual specificity protein kinase CLK1                     | CLK1         | CHEMBL   |
| Dual specificity protein kinase CLK3                     | CLK3         | CHEMBL   |
| Collagen alpha-1(I) chain                                | COL1A1       | TCMSP    |
| Collagen alpha-1(III) chain                              | COL3A1       | TCMSP    |
| C-reactive protein                                       | CRP          | TCMSP    |

|                                    |         |                          |
|------------------------------------|---------|--------------------------|
| Casein kinase I isoform gamma-1    | CSNK1G1 | CHEMBL                   |
| Casein kinase I isoform gamma-2    | CSNK1G2 | CHEMBL                   |
| Casein kinase I isoform gamma-3    | CSNK1G3 | CHEMBL                   |
| Cathepsin D                        | CTSD    | TCMSP                    |
| Cathepsin L1                       | CTSL    | CHEMBL                   |
| C-X-C motif chemokine 10           | CXCL10  | TCMSP                    |
| C-X-C motif chemokine 11           | CXCL11  | TCMSP                    |
| C-X-C motif chemokine 2            | CXCL2   | TCMSP                    |
| Interleukin-8                      | CXCL8   | TCMSP                    |
| C-X-C chemokine receptor type 1    | CXCR1   | CHEMBL                   |
| Aromatase (CYP19)                  | CYP19A1 | Bindding DB、CHEMBL       |
| Cytochrome P450 1A1                | CYP1A1  | TCMSP、Bindding DB、STITCH |
| Cytochrome P450 1A2                | CYP1A2  | TCMSP、Bindding DB、CHEMBL |
| Cytochrome P450 1B1                | CYP1B1  | TCMSP、Bindding DB、STITCH |
| Cytochrome P450 2C8                | CYP2C8  | CHEMBL、STITCH            |
| Cytochrome P450 2C9                | CYP2C9  | CHEMBL                   |
| Cytochrome P450 3A4                | CYP3A4  | TCMSP                    |
| Death-associated protein kinase 1  | DAPK1   | CHEMBL                   |
| DDB1- and CUL4-associated factor 5 | DCAF5   | TCMSP                    |
| Type I iodothyronine deiodinase    | DIO1    | TCMSP                    |
| Myotonin-protein kinase            | DMPK    | CHEMBL                   |
| Dipeptidyl peptidase IV            | DPP4    | TCMSP、CHEMBL             |
| Dual oxidase 2                     | DUOX2   | TCMSP                    |
| Transcription factor E2F1          | E2F1    | TCMSP                    |

Table S1 Quercetin target list (Continued)

| Gene                                                       | Abbreviation | Database           |
|------------------------------------------------------------|--------------|--------------------|
| Transcription factor E2F2                                  | E2F2         | TCMSP              |
| Pro-epidermal growth factor                                | EGF          | TCMSP              |
| MER intracellular domain/EGFR extracellular domain chimera | EGFR         | Bindding DB、CHEMBL |
| Histone-lysine N-methyltransferase EHMT2                   | EHMT2        | CHEMBL             |
| Eukaryotic translation initiation factor 6                 | EIF6         | TCMSP              |
| ETS domain-containing protein Elk-1                        | ELK1         | TCMSP              |
| Receptor tyrosine-protein kinase erbB-2                    | ERBB2        | TCMSP              |
| Receptor tyrosine-protein kinase erbB-3                    | ERBB3        | TCMSP              |
| Estrogen receptor                                          | ESR1         | CHEMBL             |
| Thrombin                                                   | F2           | TCMSP、Bindding DB  |
| Tissue factor                                              | F3           | TCMSP              |
| Coagulation factor VII                                     | F7           | TCMSP              |
| Enoyl-acyl-carrier protein reductase                       | FASN         | Bindding DB        |

|                                                  |          |                    |
|--------------------------------------------------|----------|--------------------|
| Tyrosine-protein kinase receptor FLT3            | FLT3     | Bindding DB、CHEMBL |
| Proto-oncogene c-Fos                             | FOS      | TCMSP              |
| Gamma-aminobutyric acid receptor subunit alpha-1 | GABRA1   | TCMSP              |
| AXL receptor tyrosine kinase                     | GAS6     | Bindding DB        |
| Gap junction alpha-1 protein                     | GJA1     | TCMSP              |
| Glyoxalase 1 (GLO1)                              | GLO1     | Bindding DB、CHEMBL |
| Glycogen Synthase Kinase-3, beta                 | GSK3B    | Bindding DB        |
| Glutathione reductase, mitochondrial             | GSR      | CHEMBL             |
| Glutathione S-transferase Mu 1                   | GSTM1    | TCMSP              |
| Glutathione S-transferase Mu 2                   | GSTM2    | TCMSP              |
| Glutathione S-transferase P                      | GSTP1    | TCMSP              |
| Hyaluronan synthase 2                            | HAS2     | TCMSP              |
| Tyrosine-protein kinase HCK                      | HCK      | STITCH             |
| 3-hydroxyisobutyryl-CoA hydrolase, mitochondrial | HIBCH    | STITCH             |
| Hypoxia-inducible factor 1-alpha                 | HIF1A    | TCMSP              |
| Hexokinase-2                                     | HK2      | TCMSP              |
| Heme oxygenase 1                                 | HMOX1    | TCMSP              |
| Corticosteroid 11-beta-dehydrogenase isozyme 1   | HSD11B1  | CHEMBL             |
| Estradiol 17-beta-dehydrogenase 1                | HSD17B1  | CHEMBL             |
| 3-hydroxyacyl-CoA dehydrogenase type-2           | HSD17B10 | CHEMBL             |
| Estradiol 17-beta-dehydrogenase 2                | HSD17B2  | Bindding DB、CHEMBL |

Table S1 Quercetin target list (Continued)

| Gene                                         | Abbreviation | Database     |
|----------------------------------------------|--------------|--------------|
| Heat shock factor protein 1                  | HSF1         | TCMSP        |
| Heat shock protein HSP 90                    | HSP90AA1     | TCMSP        |
| 78 kDa glucose-regulated protein             | HSPA5        | TCMSP        |
| Heat shock protein beta-1                    | HSPB1        | TCMSP、CHEMBL |
| Intercellular adhesion molecule 1            | ICAM1        | TCMSP        |
| Isocitrate dehydrogenase [NADP] cytoplasmic  | IDH1         | CHEMBL       |
| Interferon gamma                             | IFNG         | TCMSP        |
| Insulin-like growth factor I receptor        | IGF1R        | Bindding DB  |
| Insulin-like growth factor II                | IGF2         | TCMSP        |
| Insulin-like growth factor-binding protein 3 | IGFBP3       | TCMSP        |
| Interleukin-10                               | IL10         | TCMSP        |
| Interleukin-1 alpha                          | IL1A         | TCMSP        |
| Interleukin-1 beta                           | IL1B         | TCMSP        |
| Interleukin-2                                | IL2          | TCMSP        |
| Interleukin-6                                | IL6          | TCMSP        |
| Insulin receptor                             | INSR         | TCMSP        |
| Interferon regulatory factor 1               | IRF1         | TCMSP        |
| Tyrosine-protein kinase JAK1                 | JAK1         | CHEMBL       |
| Transcription factor AP-1                    | JUN          | TCMSP        |

|                                                             |          |              |
|-------------------------------------------------------------|----------|--------------|
| Potassium voltage-gated channel subfamily H member 2        | KCNH2    | TCMSP        |
| Vascular endothelial growth factor receptor 2               | KDR      | CHEMBL       |
| Interstitial collagenase                                    | LSS      | TCMSP        |
| Monoamine oxidase                                           | MAOA     | Bindding DB  |
| Amine oxidase [flavin-containing] B                         | MAOB     | TCMSP、CHEMBL |
| Dual specificity mitogen-activated protein kinase kinase 6  | MAP2K6   | CHEMBL       |
| Mitogen-activated protein kinase kinase kinase 5            | MAP3K5   | CHEMBL       |
| Mitogen-activated protein kinase 1                          | MAPK1    | TCMSP        |
| MAP kinase-activated protein kinase 2                       | MAPKAPK2 | CHEMBL       |
| MAP kinase-activated protein kinase 5                       | MAPKAPK5 | CHEMBL       |
| Induced myeloid leukemia cell differentiation protein Mcl-1 | MCL1     | STITCH       |
| Hepatocyte growth factor receptor                           | MET      | Bindding DB  |
| Maltase-glucoamylase, intestinal                            | MGAM     | TCMSP        |

Table S1 Quercetin target list (Continued)

| Gene                                          | Abbreviation | Database     |
|-----------------------------------------------|--------------|--------------|
| Matrix metalloproteinase-12 (MMP12)           | MMP12        | Bindding DB  |
| 72 kDa type IV collagenase                    | MMP2         | TCMSP        |
| Stromelysin-1                                 | MMP3         | TCMSP        |
| Matrix metalloproteinase-9                    | MMP9         | TCMSP、CHEMBL |
| DNA-3-methyladenine glycosylase               | MPG          | CHEMBL       |
| Myeloperoxidase                               | MPO          | TCMSP、CHEMBL |
| Myc proto-oncogene protein                    | MYC          | TCMSP        |
| Neutrophil cytosol factor 1                   | NCF1         | TCMSP        |
| Nuclear receptor coactivator 2                | NCOA2        | TCMSP        |
| Serine/threonine-protein kinase Nek6          | NEK6         | CHEMBL       |
| Sialidase                                     | NEU1         | Bindding DB  |
| Nuclear factor erythroid 2-related factor 2   | NFE2L2       | TCMSP        |
| Nuclear factor NF-kappa-B p105 subunit        | NFKB1        | CHEMBL       |
| NF-kappa-B inhibitor alpha                    | NFKBIA       | TCMSP        |
| Homeobox protein Nkx-3.1                      | NKX3-1       | TCMSP        |
| Nitric oxide synthase, endothelial            | NOS3         | TCMSP        |
| NADPH oxidase 4                               | NOX4         | Bindding DB  |
| Puromycin-sensitive aminopeptidase            | NPEPPS       | TCMSP        |
| Neuropeptide S receptor                       | NPSR1        | CHEMBL       |
| NAD(P)H dehydrogenase [quinone] 1             | NQO1         | TCMSP        |
| Nuclear receptor subfamily 1 group I member 2 | NR1I2        | TCMSP        |
| Nuclear receptor subfamily 1 group I member 3 | NR1I3        | TCMSP        |
| NUAK family SNF1-like kinase 1                | NUAK1        | CHEMBL       |
| Ornithine decarboxylase                       | ODC1         | TCMSP        |
| Serine/threonine-protein kinase PAK 4         | PAK4         | CHEMBL       |

|                                                                                 |        |                          |
|---------------------------------------------------------------------------------|--------|--------------------------|
| Serine/threonine-protein kinase PAK 5                                           | PAK5   | CHEMBL                   |
| Poly [ADP-ribose] polymerase 1                                                  | PARP1  | TCMSP                    |
| Lymphokine-activated killer T-cell-originated protein kinase                    | PBK    | CHEMBL                   |
| Procollagen C-endopeptidase enhancer 1                                          | PCOLCE | TCMSP                    |
| Phosphatidylinositol-4,5-bisphosphate 3-kinase catalytic subunit, gamma isoform | PIK3CG | TCMSP、Bindding DB、CHEMBL |
| Serine/threonine-protein kinase PIM                                             | PIM1   | Bindding DB、STITCH       |
| Peptidyl-prolyl cis-trans isomerase NIMA-interacting 1                          | PIN1   | CHEMBL                   |

Table S1 Quercetin target list (Continued)

| Gene                                                                                                 | Abbreviation | Database          |
|------------------------------------------------------------------------------------------------------|--------------|-------------------|
| Phospholipase A2                                                                                     | PLA2G1B      | CHEMBL            |
| Urokinase-type plasminogen activator                                                                 | PLAU         | TCMSP、CHEMBL      |
| Plasminogen                                                                                          | PLG          | CHEMBL            |
| DNA polymerase beta                                                                                  | POLB         | CHEMBL            |
| Serum paraoxonase/arylesterase 1                                                                     | PON1         | TCMSP             |
| NADPH--cytochrome P450 reductase                                                                     | POR          | TCMSP             |
| Peroxisome proliferator-activated receptor alpha                                                     | PPARA        | TCMSP             |
| Peroxisome proliferator-activated receptor delta                                                     | PPARD        | TCMSP             |
| Peroxisome proliferator-activated receptor gamma                                                     | PPARG        | TCMSP、CHEMBL      |
| 5'-AMP-activated protein kinase catalytic subunit alpha-2                                            | PRKAA2       | CHEMBL            |
| Protein kinase C alpha type                                                                          | PRKCA        | TCMSP、CHEMBL      |
| Protein kinase C beta type                                                                           | PRKCB        | TCMSP             |
| Trypsin-1                                                                                            | PRSS1        | TCMSP             |
| lens epithelium-derived growth factor p75                                                            | PSIP1        | Bindding DB       |
| 26S proteasome non-ATPase regulatory subunit 3                                                       | PSMD3        | TCMSP             |
| Phosphatidylinositol-3,4,5-trisphosphate 3-phosphatase and dual-specificity protein phosphatase PTEN | PTEN         | TCMSP             |
| Prostaglandin E2 receptor EP3 subtype                                                                | PTGER3       | TCMSP             |
| Prostaglandin G/H synthase 1                                                                         | PTGS1        | TCMSP、CHEMBL      |
| Prostaglandin G/H synthase 2                                                                         | PTGS2        | TCMSP、Bindding DB |
| Glycogen phosphorylase, liver form                                                                   | PYGL         | CHEMBL            |
| RAF proto-oncogene serine/threonine-protein kinase                                                   | RAF1         | TCMSP             |
| Rap guanine nucleotide exchange factor 3                                                             | RAPGEF3      | CHEMBL            |
| Ras GTPase-activating protein 1                                                                      | RASA1        | TCMSP             |
| Ras association domain-containing protein 1                                                          | RASSF1       | TCMSP             |
| Retinoblastoma-associated protein                                                                    | RB1          | TCMSP             |
| Transcription factor p65                                                                             | RELA         | TCMSP             |
| Regulator of G-protein signaling 4                                                                   | RGS4         | CHEMBL            |
| Ribosomal protein S6 kinase beta-1                                                                   | RPS6KB1      | CHEMBL            |

|                                             |         |       |
|---------------------------------------------|---------|-------|
| Protein CBFA2T1                             | RUNX1T1 | TCMSP |
| Runt-related transcription factor 2         | RUNX2   | TCMSP |
| Retinoic acid receptor RXR-alpha            | RXRA    | TCMSP |
| Sodium channel protein type 5 subunit alpha | SCN5A   | TCMSP |

Table S1 Quercetin target list (Continued)

| Gene                                                                 | Abbreviation | Database          |
|----------------------------------------------------------------------|--------------|-------------------|
| E-selectin                                                           | SELE         | TCMSP             |
| Plasminogen activator inhibitor 1                                    | SERPINE1     | TCMSP             |
| Solute carrier family 2, facilitated glucose transporter member 2    | SLC2A2       | STITCH            |
| Solute carrier family 2, facilitated glucose transporter member 4    | SLC2A4       | TCMSP             |
| Solute carrier organic anion transporter family member 1B3           | SLCO1B3      | CHEMBL            |
| STE20-like serine/threonine-protein kinase                           | SLK          | CHEMBL            |
| Mothers against decapentaplegic homolog 3                            | SMAD3        | CHEMBL            |
| Superoxide dismutase [Cu-Zn]                                         | SOD1         | TCMSP             |
| Osteopontin                                                          | SPP1         | TCMSP             |
| SRC                                                                  | SRC          | Binding DB、CHEMBL |
| Signal transducer and activator of transcription 1-alpha/beta        | STAT1        | TCMSP             |
| Signal transducer and activator of transcription 6                   | STAT6        | CHEMBL            |
| Serine/threonine-protein kinase 17A                                  | STK17A       | CHEMBL            |
| Serine/threonine-protein kinase 17B                                  | STK17B       | STITCH            |
| Serine/threonine-protein kinase 25                                   | STK25        | CHEMBL            |
| Serine/threonine-protein kinase 4                                    | STK4         | CHEMBL            |
| Estrogen sulfotransferase                                            | SULT1E1      | TCMSP             |
| Tyrosine-protein kinase SYK                                          | SYK          | CHEMBL            |
| Synapsin-1                                                           | SYN1         | Binding DB        |
| Transforming growth factor beta-1                                    | TGFB1        | TCMSP             |
| Thrombomodulin                                                       | THBD         | TCMSP             |
| Thyroid hormone receptor beta                                        | THRB         | CHEMBL            |
| Tumor necrosis factor                                                | TNF          | TCMSP             |
| TRAF2 and NCK-interacting protein kinase                             | TNIK         | CHEMBL            |
| Human diphtheria toxin-like ADP-ribosyltransferase (ARTD5 or PARP5a) | TNKS         | Binding DB        |
| Human diphtheria toxin-like ADP-ribosyltransferase (ARTD6 or PARP5b) | TNKS2        | Binding DB        |
| DNA topoisomerase 1                                                  | TOP1         | TCMSP、Binding DB  |
| DNA topoisomerase 2-alpha                                            | TOP2A        | TCMSP、CHEMBL      |
| DNA topoisomerase II                                                 | TOP2B        | TCMSP             |

Table S1 Quercetin target list (Continued)

| Gene                                          | Abbreviation | Database                 |
|-----------------------------------------------|--------------|--------------------------|
| Cellular tumor antigen p53                    | TP53         | TCMSP、CHEMBL             |
| TTR                                           | TTR          | Bindding DB              |
| Tyrosinase                                    | TYR          | Bindding DB、CHEMBL       |
| UDP-glucuronosyltransferase 1-3               | UGT1A3       | CHEMBL                   |
| UDP-glucuronosyltransferase 1-4               | UGT1A4       | CHEMBL                   |
| UDP-glucuronosyltransferase 1-9               | UGT1A9       | CHEMBL                   |
| Vascular cell adhesion protein 1              | VCAM1        | TCMSP                    |
| Vascular endothelial growth factor A          | VEGFA        | TCMSP                    |
| Serine/threonine-protein kinase VRK2          | VRK2         | CHEMBL                   |
| Inactive serine/threonine-protein kinase VRK3 | VRK3         | CHEMBL                   |
| Xanthine oxidase                              | XDH          | TCMSP、Bindding DB、CHEMBL |

Note: there are 262 quercetin targets in total

Table S2 Kaempferol target list

| Gene                                                    | Abbreviation | Database                        |
|---------------------------------------------------------|--------------|---------------------------------|
| P-glycoprotein 1                                        | ABCB1        | Bindding DB、CHEMBL              |
| Multidrug resistance-associated protein 1               | ABCC1        | CHEMBL                          |
| ATP-binding cassette sub-family G member 2              | ABCG2        | CHEMBL                          |
| Acetylcholinesterase                                    | ACHE         | TCMSP、CHEMBL                    |
| Ecto-5'-nucleotidase (e5'NT)                            | ACPP         | Bindding DB                     |
| Adenosine receptor A1                                   | ADORA1       | Bindding DB                     |
| Adenosine Receptors A2a (A2a)                           | ADORA2A      | Bindding DB                     |
| Adenosine receptor A3                                   | ADORA3       | Bindding DB                     |
| Alpha-1B adrenergic receptor                            | ADRA1B       | TCMSP                           |
| Aryl hydrocarbon receptor                               | AHR          | TCMSP、Bindding DB、STITCH、CHEMBL |
| Activator of 90 kDa heat shock protein ATPase homolog 1 | AHSA1        | TCMSP                           |
| Aldose reductase (AR)                                   | AKR1B1       | Bindding DB、CHEMBL              |
| RAC-alpha serine/threonine-protein kinase               | AKT1         | TCMSP                           |
| Arachidonate 12-lipoxygenase                            | ALOX12       | Bindding DB                     |
| Arachidonate 15-lipoxygenase                            | ALOX15       | Bindding DB、CHEMBL              |
| Arachidonate 15-lipoxygenase, type II                   | ALOX15B      | Bindding DB                     |
| Arachidonate 5-lipoxygenase                             | ALOX5        | TCMSP、Bindding DB、CHEMBL        |
| Salivary alpha-amylase                                  | AMY1A        | CHEMBL                          |
| DNA-(apurinic or apyrimidinic site) lyase               | APEX1        | CHEMBL                          |
| Beta amyloid A4 protein                                 | APP          | CHEMBL                          |
| Androgen receptor                                       | AR           | TCMSP、CHEMBL                    |
| Aurora kinase B/Inner centromere protein                | AURKB        | Bindding DB                     |
| Beta-secretase 1                                        | BACE1        | CHEMBL                          |



|                           |      |                   |
|---------------------------|------|-------------------|
| Apoptosis regulator BAX   | BAX  | TCMSP             |
| Butyrylcholinesterase     | BCHE | CHEMBL            |
| Apoptosis regulator Bcl-2 | BCL2 | TCMSP             |
| Carbonic anhydrase I      | CA1  | CHEMBL            |
| Carbonic anhydrase 12     | CA12 | Binding DB、CHEMBL |
| Carbonic anhydrase 2      | CA2  | Binding DB、CHEMBL |
| Carbonic anhydrase 4      | CA4  | Binding DB、CHEMBL |
| Carbonic anhydrase 7      | CA7  | Binding DB、CHEMBL |
| Calmodulin                | CALM | TCMSP             |

Table S2 Kaempferol target list (Continued)

| Gene                                                                        | Abbreviation | Database                       |
|-----------------------------------------------------------------------------|--------------|--------------------------------|
| Caspase-3                                                                   | CASP6        | TCMSP                          |
| Catalase                                                                    | CAT          | CHEMBL                         |
| Carbonyl reductase [NADPH] 1                                                | CBR1         | Binding DB                     |
| Cell division control protein 2 homolog                                     | CDK1         | TCMSP、Binding DB、STITCH        |
| Cyclin-Dependent Kinase 5                                                   | CDK5         | Binding DB                     |
| Cyclin-Dependent Kinase 6                                                   | CDK6         | Binding DB、CHEMBL              |
| CFTR                                                                        | CFTR         | Binding DB                     |
| Muscarinic acetylcholine receptor M1                                        | CHRM1        | TCMSP                          |
| Muscarinic acetylcholine receptor M2                                        | CHRM2        | TCMSP                          |
| CDGSH iron-sulfur domain-containing protein 1                               | CISD1        | CHEMBL                         |
| Casein Kinase II                                                            | CSNK2A1      | Binding DB、CHEMBL              |
| Carboxy-terminal domain RNA polymerase II polypeptide A small phosphatase 1 | CTDSP1       | CHEMBL                         |
| Aromatase (CYP19)                                                           | CYP19A1      | Binding DB                     |
| Cytochrome P450 1A1                                                         | CYP1A1       | TCMSP、Binding DB、CHEMBL        |
| Cytochrome P450 1A                                                          | CYP1A2       | TCMSP、Binding DB、CHEMBL        |
| Cytochrome P450 1B1                                                         | CYP1B1       | TCMSP、Binding DB、STITCH、CHEMBL |
| Cytochrome P450 2C19                                                        | CYP2C19      | CHEMBL                         |
| Cytochrome P450 2C9                                                         | CYP2C9       | CHEMBL                         |
| Cytochrome P450 2D6                                                         | CYP2D6       | CHEMBL                         |
| Cytochrome P450 3A4                                                         | CYP3A4       | TCMSP、CHEMBL                   |
| Death-associated protein kinase 1                                           | DAPK1        | CHEMBL                         |
| Type I iodothyronine deiodinase                                             | DIO1         | TCMSP                          |
| Dipeptidyl peptidase IV                                                     | DPP4         | TCMSP、CHEMBL                   |
| MER intracellular domain/EGFR extracellular domain chimera                  | EGFR         | Binding DB、CHEMBL              |
| Estrogen receptor alpha                                                     | ESR1         | CHEMBL                         |

|                                       |       |                   |
|---------------------------------------|-------|-------------------|
| Estradiol receptor beta (ER $\beta$ ) | ESR2  | Bindding DB       |
| Estrogen-related receptor alpha       | ESRRA | CHEMBL            |
| Thrombin                              | F2    | TCMSP、Bindding DB |
| Coagulation factor VII                | F7    | TCMSP             |

Table S2 Kaempferol target list (Continued)

| Gene                                                                  | Abbreviation | Database           |
|-----------------------------------------------------------------------|--------------|--------------------|
| Enoyl-acyl-carrier protein reductase                                  | FASN         | Bindding DB        |
| Flap endonuclease 1                                                   | FEN1         | CHEMBL             |
| Tyrosine-protein kinase receptor FLT3                                 | FLT3         | Bindding DB、CHEMBL |
| Gamma-aminobutyric acid receptor subunit alpha-1                      | GABRA1       | TCMSP              |
| Gamma-aminobutyric-acid receptor alpha-2 subunit                      | GABRA2       | TCMSP              |
| AXL receptor tyrosine kinase                                          | GAS6         | Bindding DB        |
| Beta-glucocerebrosidase                                               | GBA          | CHEMBL             |
| Glyoxalase 1                                                          | GLO1         | Bindding DB、CHEMBL |
| Glycogen Synthase Kinase-3, beta                                      | GSK3B        | Bindding DB        |
| Glutathione S-transferase Mu 1                                        | GSTM1        | TCMSP              |
| Glutathione S-transferase Mu 2                                        | GSTM2        | TCMSP              |
| Glutathione S-transferase P                                           | GSTP1        | TCMSP              |
| Hyaluronan synthase 2                                                 | HAS2         | TCMSP              |
| Hypoxia-inducible factor 1 alpha                                      | HIF1A        | CHEMBL             |
| Heme oxygenase 1                                                      | HMOX1        | TCMSP              |
| Aldehyde dehydrogenase 1A1                                            | HPGD         | CHEMBL             |
| Estradiol 17-beta-dehydrogenase 1 (17beta-HSD1)                       | HSD17B1      | Bindding DB、CHEMBL |
| Endoplasmic reticulum-associated amyloid beta-peptide-binding protein | HSD17B10     | CHEMBL             |
| Estradiol 17-beta-dehydrogenase 2                                     | HSD17B2      | Bindding DB、CHEMBL |
| Heat shock protein HSP 90                                             | HSP90AA1     | TCMSP              |
| Intercellular adhesion molecule 1                                     | ICAM1        | TCMSP              |
| Isocitrate dehydrogenase [NADP] cytoplasmic                           | IDH1         | CHEMBL             |
| Insulin-like growth factor I receptor                                 | IGF1R        | Bindding DB        |
| Inhibitor of nuclear factor kappa-B kinase subunit beta               | IKBKB        | TCMSP              |
| Insulin receptor                                                      | INSR         | TCMSP              |
| Transcription factor AP-1                                             | JUN          | TCMSP              |
| HERG                                                                  | KCNH2        | CHEMBL             |
| Calcium-activated potassium channel subunit alpha-1                   | KCNMA1       | CHEMBL             |
| Lysine-specific demethylase 4A                                        | KDM4A        | CHEMBL             |
| Lysine-specific demethylase 4D-like                                   | KDM4E        | CHEMBL             |
| Prelamin-A/C                                                          | LMNA         | CHEMBL             |
| Interstitial collagenase                                              | LSS          | TCMSP              |

Table S2 Kaempferol target list (Continued)

| Gene                                                                    | Abbreviation | Database           |
|-------------------------------------------------------------------------|--------------|--------------------|
| Monoamine oxidase                                                       | MAOA         | Bindding DB        |
| Mitogen-activated protein kinase 8                                      | MAPK8        | TCMSP              |
| Microtubule-associated protein tau                                      | MAPT         | CHEMBL             |
| Hepatocyte growth factor receptor                                       | MET          | Bindding DB        |
| alpha-Glucosidase ( $\alpha$ -Glucosidase)                              | MGAM         | Bindding DB        |
| DNA-3-methyladenine glycosylase                                         | MPG          | CHEMBL             |
| Myeloperoxidase                                                         | MPO          | CHEMBL             |
| Nuclear receptor coactivator 2                                          | NCOA2        | TCMSP              |
| Sialidase                                                               | NEU1         | Bindding DB        |
| Sialidase 2                                                             | NEU2         | CHEMBL             |
| Nuclear factor erythroid 2-related factor 2                             | NFE2L2       | CHEMBL             |
| Nitric oxide synthase, inducible                                        | NOS2         | TCMSP              |
| Nitric-oxide synthase, endothelial                                      | NOS3         | TCMSP              |
| NADPH oxidase 4                                                         | NOX4         | Bindding DB、CHEMBL |
| Bile acid receptor FXR                                                  | NR1H4        | CHEMBL             |
| Nuclear receptor subfamily 1 group I member 2                           | NR1I2        | TCMSP、STITCH       |
| Nuclear receptor subfamily 1 group I member 3                           | NR1I3        | TCMSP              |
| Glucocorticoid receptor                                                 | NR3C1        | CHEMBL             |
| Progesterone receptor                                                   | PGR          | TCMSP              |
| PI3-kinase subunit gamma                                                | PIK3CG       | TCMSP、Bindding DB  |
| Serine/threonine-protein kinase PIM                                     | PIM1         | Bindding DB、CHEMBL |
| DNA polymerase eta                                                      | POLH         | CHEMBL             |
| DNA polymerase iota                                                     | POLI         | CHEMBL             |
| Serum paraoxonase/arylesterase 1                                        | PON1         | CHEMBL             |
| Peroxisome proliferator-activated receptor alpha                        | PPARA        | CHEMBL             |
| Peroxisome proliferator-activated receptor delta                        | PPARD        | CHEMBL             |
| Peroxisome proliferator-activated receptor gamma                        | PPARG        | TCMSP、CHEMBL       |
| Serine/threonine-protein phosphatase 2B catalytic subunit alpha isoform | PPP3CA       | TCMSP              |
| Prolyl endopeptidase                                                    | PREP         | CHEMBL             |
| Trypsin-1                                                               | PRSS1        | TCMSP              |
| lens epithelium-derived growth factor p75                               | PSIP1        | Bindding DB        |
| 26S proteasome non-ATPase regulatory subunit 3                          | PSMD3        | TCMSP              |
| Prostaglandin G/H synthase 1                                            | PTGS1        | TCMSP、CHEMBL       |
| Receptor-type tyrosine-protein phosphatase S                            | PTPRS        | CHEMBL             |

Table S2 Kaempferol target list (Continued)

| Gene                                                              | Abbreviation | Database           |
|-------------------------------------------------------------------|--------------|--------------------|
| Rac GTPase-activating protein 1                                   | RACGAP1      | CHEMBL             |
| Transcription factor p65                                          | RELA         | TCMSP              |
| Nuclear receptor ROR-gamma                                        | RORC         | CHEMBL             |
| Ribosomal protein S6 kinase alpha-3                               | RPS6KA3      | STITCH             |
| Retinoid X receptor alpha                                         | RXRA         | CHEMBL             |
| E-selectin                                                        | SELE         | TCMSP              |
| Sucrase-isomaltase                                                | SI           | Bindding DB        |
| Glucose transporter                                               | SLC2A1       | CHEMBL             |
| Solute carrier family 2, facilitated glucose transporter member 4 | SLC2A4       | TCMSP              |
| Sodium-dependent noradrenaline transporter                        | SLC6A2       | TCMSP              |
| Antileukoproteinase                                               | SLPI         | TCMSP              |
| Superoxide dismutase                                              | SOD1         | CHEMBL             |
| SRC                                                               | SRC          | Bindding DB        |
| Signal transducer and activator of transcription 1-alpha/beta     | STAT1        | TCMSP              |
| Synapsin-1                                                        | SYN1         | Bindding DB        |
| Tyrosyl-DNA phosphodiesterase 1                                   | TDP1         | CHEMBL             |
| Tumor necrosis factor                                             | TNF          | TCMSP              |
| DNA topoisomerase II alpha                                        | TOP2A        | CHEMBL             |
| DNA topoisomerase II                                              | TOP2B        | TCMSP              |
| Cellular tumor antigen p53                                        | TP53         | CHEMBL             |
| TTR                                                               | TTR          | Bindding DB        |
| Tyrosinase                                                        | TYR          | Bindding DB、CHEMBL |
| UDP-glucuronosyltransferase 1-3                                   | UGT1A3       | STITCH             |
| UDP-glucuronosyltransferase 1-7                                   | UGT1A7       | STITCH             |
| UDP-glucuronosyltransferase 1-8                                   | UGT1A8       | STITCH             |
| UDP-glucuronosyltransferase 1-9                                   | UGT1A9       | STITCH             |
| UDP-glucuronosyltransferase 3A1                                   | UGT3A1       | STITCH             |
| Ubiquitin carboxyl-terminal hydrolase 1                           | USP1         | CHEMBL             |
| Vascular cell adhesion protein 1                                  | VCAM1        | TCMSP              |
| Xanthine dehydrogenase                                            | XDH          | Bindding DB、CHEMBL |
| Xanthine dehydrogenase/oxidase                                    | XDH          | TCMSP              |
| Inhibitor of apoptosis protein 3                                  | XIAP         | CHEMBL             |

Note: there are 159 kaempferol targets in total
